# Supplementary material for: 3D Ln-MOFs as multi-responsive luminescent probes for efficient sensing of Fe3+, Cr2O72−, and antibiotics in aqueous solution
Source: Royal Society of Chemistry journal article supplement (doi:10.1039/d1ce00399b), 2021-01-01
Supplement: d1ce00399b1.pdf [file d1ce00399b1.pdf]

*Electronic Supplementary Information (ESI) for*

# **3D Ln-MOFs as multi-responsive luminescent probe for efficient sensing of Fe<sup>3+</sup>, Cr<sub>2</sub>O<sub>7</sub><sup>2-</sup>, and antibiotics in aqueous solution**

Yun-Shan Xue,<sup>a</sup> Ji Ding,<sup>a</sup> Dan-Ling Sun,<sup>a</sup> Wei-Wei Cheng,<sup>b</sup> Xing-Cai Huang,<sup>\*a</sup> Jun Wang<sup>\*a</sup>

<sup>a</sup>*School of Chemistry & Environmental Engineering, Yancheng Teachers University, Yancheng, 224007, China.*

<sup>b</sup>*School of Chemistry and Bioengineering, Nanjing Normal University Taizhou College, Taizhou 225300, China.*

*E-mail: [wjyctu@hotmail.com](mailto:wjyctu@hotmail.com); [huangxc82@126.com](mailto:huangxc82@126.com).*

## **Table of Contents**

### **1. Experimental section**

#### **2. Tables**

Table S1. Crystallographic Data collection and Refinement result for compounds **1-7**.

Table S2. Selected bond lengths (Å) and angles (deg) for compounds **1-7**.

Table S3. Comparison of various MOFs sensors for the detection of Fe<sup>3+</sup> and Cr<sub>2</sub>O<sub>7</sub><sup>2-</sup> ions.

Table S4. Comparison of various MOFs sensors for the detection of NZF and NFT.

#### **3. Figures**

Figure S1. PXRD pattern of compound Ce(**1**).

Figure S2. PXRD pattern of compound Pr(**2**).

Figure S3. PXRD pattern of compound Sm(**3**).

Figure S4. PXRD pattern of compound Eu(**4**).

Figure S5. PXRD pattern of compound Gd(**5**).

Figure S6. PXRD pattern of compound Dy(**6**).

Figure S7. PXRD pattern of compound Ho(**7**).

Figure S8. TGA curves for compounds **1-7**.

Figure S9. The solid state photoluminescence spectra for H<sub>3</sub>L ligand.

Figure S10. The photoluminescence spectra for Eu(**4**) (Inset: the excitation spectra of (**4**)).

Figure S11. PXRD pattern of Eu(**4**) soaked into aqueous solutions with different pH values.

Figure S12. (a) pH-dependent emission spectra of Eu(**4**) in the aqueous solution with pH ranging from 1.00 to 13.00; (b) Histogram showed fluorescence emission of Eu(**4**) at 614 nm at different pH values.

Figure S13. The emission spectra of Eu(**4**) dispersed in 0.01 M metal ion aqueous solutions.

Figure S14. The emission spectra of Eu(**4**) dispersed in 0.01 M anion aqueous solutions.

Figure S15. UV-vis spectra of different metal ions in aqueous solutions, and the excitation spectra of Eu(**4**).

Figure S16. UV-vis spectra of different anions in aqueous solutions, and the excitation spectra of Eu(4).

Figure S17. The HOMO and LUMO energy levels for different antibiotics.

Scheme S1. The structures of selected antibiotics.

## 1. Experimental section

### X-ray crystallography

Suitable single crystals of the seven compounds were performed on Bruker APEX D8 QUEST diffractometer with a Photon 100 CMOS detector (Mo-K $\alpha$  radiation,  $\lambda = 0.71073 \text{ \AA}$ ). SADABS and SAINT programs were applied for absorption correction and data processing. The structures were solved by direct methods and refined with full-matrix least-squares on  $F^2$  using the SHELXTL-2014 software package.<sup>1</sup> All the non-hydrogen atoms were refined anisotropically. The hydrogen atoms of organic ligands were placed in geometrically calculated positions and refined using the riding model. In compounds **1**, **2**, **3** and **5**, coordinated DMF molecules were disordered and split over two sites. In compound **6**, one coordinated water molecule and O3 atom were disordered and split over two sites. In compound **7**, one coordinated water molecule was disordered and split over two sites. Some C–C bond distances were restrained because of disorder. Details of the crystallographic data are listed in Table S1. Selected bond lengths and angles for compounds **1-7** are provided in Table S2. CCDC numbers: 2071646, 2071647, 2071648, 2071649, 2071650, 2071651, 2071652 for compounds 1-7, respectively.

### Calculations

The calculation of the ligand was performed using the Gaussian 09 program. The structure was completely optimized to the ground state by the DFT method at D-B3LYP/6-31G\* level. Then the singlet and triplet energy of structures were calculated based on TD-SCF method.

## 2. Tables

Table S1. Crystallographic Data collection and Refinement result for compounds **1-7**.

| Compound reference                                       | 1                                                                              | 2                                                                              | 3                                                                              | 4                                                                              | 5                                                                              | 6                                                                  | 7                                                                  |
|----------------------------------------------------------|--------------------------------------------------------------------------------|--------------------------------------------------------------------------------|--------------------------------------------------------------------------------|--------------------------------------------------------------------------------|--------------------------------------------------------------------------------|--------------------------------------------------------------------|--------------------------------------------------------------------|
| chemical formula                                         | C <sub>47</sub> H <sub>55</sub> Ce <sub>2</sub> N <sub>5</sub> O <sub>20</sub> | C <sub>47</sub> H <sub>53</sub> Pr <sub>2</sub> N <sub>5</sub> O <sub>19</sub> | C <sub>47</sub> H <sub>53</sub> Sm <sub>2</sub> N <sub>5</sub> O <sub>19</sub> | C <sub>44</sub> H <sub>46</sub> Eu <sub>2</sub> N <sub>4</sub> O <sub>18</sub> | C <sub>47</sub> H <sub>53</sub> Gd <sub>2</sub> N <sub>5</sub> O <sub>19</sub> | C <sub>32</sub> H <sub>23</sub> Dy <sub>2</sub> O <sub>16.50</sub> | C <sub>32</sub> H <sub>23</sub> Ho <sub>2</sub> O <sub>16.50</sub> |
| Crystal system                                           | monoclinic                                                                     | monoclinic                                                                     | monoclinic                                                                     | monoclinic                                                                     | monoclinic                                                                     | trigonal                                                           | trigonal                                                           |
| Space group                                              | <i>C2/c</i>                                                                    | <i>C2/c</i>                                                                    | <i>C2/c</i>                                                                    | <i>C2/c</i>                                                                    | <i>C2/c</i>                                                                    | <i>R-3</i>                                                         | <i>R-3</i>                                                         |
| a/Å                                                      | 28.6190(12)                                                                    | 28.5809(12)                                                                    | 28.531(2)                                                                      | 28.698(4)                                                                      | 28.4297(13)                                                                    | 19.6983(10)                                                        | 19.6548(11)                                                        |
| b/Å                                                      | 14.2049(5)                                                                     | 14.1925(6)                                                                     | 14.3021(9)                                                                     | 14.307(2)                                                                      | 14.2555(6)                                                                     | 19.6983(10)                                                        | 19.6548(11)                                                        |
| c/Å                                                      | 14.1485(6)                                                                     | 14.1130(5)                                                                     | 13.7731(9)                                                                     | 13.8772(19)                                                                    | 13.8161(5)                                                                     | 45.340(2)                                                          | 45.295(3)                                                          |
| α/°                                                      | 90                                                                             | 90                                                                             | 90                                                                             | 90                                                                             | 90                                                                             | 90                                                                 | 90                                                                 |
| β/°                                                      | 100.1739(14)                                                                   | 99.9937(13)                                                                    | 100.718(2)                                                                     | 99.521(4)                                                                      | 100.144(2)                                                                     | 90                                                                 | 90                                                                 |
| γ/°                                                      | 90                                                                             | 90                                                                             | 90                                                                             | 90                                                                             | 90                                                                             | 120                                                                | 120                                                                |
| Unit cell volume/Å <sup>3</sup>                          | 5661.4(4)                                                                      | 5637.9(4)                                                                      | 5522.1(6)                                                                      | 5619.2(13)                                                                     | 5511.9(4)                                                                      | 15235.8(17)                                                        | 15153.5(19)                                                        |
| Temperature/K                                            | 150(2)                                                                         | 150(2)                                                                         | 150(2)                                                                         | 293(2)                                                                         | 150(2)                                                                         | 150(2)                                                             | 150(2)                                                             |
| Z                                                        | 4                                                                              | 4                                                                              | 4                                                                              | 4                                                                              | 4                                                                              | 9                                                                  | 9                                                                  |
| μ(mm <sup>-1</sup> )                                     | 1.662                                                                          | 1.780                                                                          | 2.180                                                                          | 2.278                                                                          | 2.459                                                                          | 2.228                                                              | 2.371                                                              |
| No. of reflections measured                              | 37048                                                                          | 38021                                                                          | 19960                                                                          | 16134                                                                          | 25032                                                                          | 33351                                                              | 50520                                                              |
| No. of independent reflections                           | 5585                                                                           | 5762                                                                           | 4849                                                                           | 4861                                                                           | 4868                                                                           | 6948                                                               | 6930                                                               |
| R <sub>int</sub>                                         | 0.0378                                                                         | 0.0324                                                                         | 0.0503                                                                         | 0.0654                                                                         | 0.0374                                                                         | 0.0248                                                             | 0.0397                                                             |
| Final R <sub>I</sub> values (I > 2σ(I))                  | 0.0419                                                                         | 0.0437                                                                         | 0.0428                                                                         | 0.0721                                                                         | 0.0441                                                                         | 0.0371                                                             | 0.0424                                                             |
| Final wR(F <sup>2</sup> ) values (I > 2σ(I))             | 0.1000                                                                         | 0.1029                                                                         | 0.1071                                                                         | 0.2097                                                                         | 0.1195                                                                         | 0.1042                                                             | 0.1246                                                             |
| Final R <sub>1</sub> <sup>a</sup> values (all data)      | 0.0464                                                                         | 0.0466                                                                         | 0.0566                                                                         | 0.1102                                                                         | 0.0492                                                                         | 0.0436                                                             | 0.0533                                                             |
| Final wR(F <sup>2</sup> ) <sup>b</sup> values (all data) | 0.1019                                                                         | 0.1042                                                                         | 0.1125                                                                         | 0.2330                                                                         | 0.1218                                                                         | 0.1087                                                             | 0.1305                                                             |
| Goodness of fit on F <sup>2</sup>                        | 1.233                                                                          | 1.169                                                                          | 1.060                                                                          | 1.091                                                                          | 1.087                                                                          | 1.057                                                              | 1.086                                                              |

$$^a R_1 = \sum ||F_o| - |F_c|| / \sum |F_o|. \quad ^b wR_2 = \sum [w(F_o^2 - F_c^2)^2] / \sum [w(F_o^2)^2]^{1/2}.$$

Table S2. Selected bond lengths (Å) and angles (deg) for compounds 1-7.

| Compound 1                             |            |                                         |            |                                        |            |                                       |            |
|----------------------------------------|------------|-----------------------------------------|------------|----------------------------------------|------------|---------------------------------------|------------|
| Ce1 O1 <sup>i</sup>                    | 2.475(4)   | Ce1 O4 <sup>ii</sup>                    | 2.705(4)   | Ce1 O7 <sup>iv</sup>                   | 2.488(3)   | Ce1 O11                               | 2.462(8)   |
| Ce1 O2                                 | 2.463(3)   | Ce1 O4 <sup>iii</sup>                   | 2.462(4)   | Ce1 O8 <sup>i</sup>                    | 2.665(4)   | Ce1 O3A                               | 2.421(10)  |
| Ce1 O3                                 | 2.461(6)   | Ce1 O5 <sup>ii</sup>                    | 2.569(4)   | Ce1 O9                                 | 2.537(6)   |                                       |            |
| O1 <sup>i</sup> Ce1 O4 <sup>ii</sup>   | 128.38(13) | O2 Ce1 O9                               | 143.21(19) | O3A Ce1 O11                            | 80.4(11)   | O5 <sup>ii</sup> Ce1 O8 <sup>i</sup>  | 123.48(12) |
| O1 <sup>i</sup> Ce1 O5 <sup>ii</sup>   | 81.91(13)  | O3 Ce1 O1 <sup>i</sup>                  | 92.4(3)    | O4 <sup>iii</sup> Ce1 O1 <sup>i</sup>  | 135.69(12) | O7 <sup>iv</sup> Ce1 O4 <sup>ii</sup> | 68.46(12)  |
| O1 <sup>i</sup> Ce1 O7 <sup>iv</sup>   | 140.99(14) | O3 Ce1 O2                               | 133.4(3)   | O4 <sup>iii</sup> Ce1 O2               | 72.97(12)  | O7 <sup>iv</sup> Ce1 O5 <sup>ii</sup> | 93.37(13)  |
| O1 <sup>i</sup> Ce1 O8 <sup>i</sup>    | 50.65(12)  | O3 Ce1 O4 <sup>iii</sup>                | 80.7(4)    | O4 <sup>iii</sup> Ce1 O4 <sup>ii</sup> | 75.69(12)  | O7 <sup>iv</sup> Ce1 O8 <sup>i</sup>  | 142.29(13) |
| O1 <sup>i</sup> Ce1 O9                 | 71.9(2)    | O3 Ce1 O4 <sup>ii</sup>                 | 138.1(3)   | O4 <sup>iii</sup> Ce1 O5 <sup>ii</sup> | 122.56(12) | O7 <sup>iv</sup> Ce1 O9               | 69.26(19)  |
| O2 Ce1 O1 <sup>i</sup>                 | 81.23(14)  | O3 Ce1 O5 <sup>ii</sup>                 | 151.1(4)   | O4 <sup>iii</sup> Ce1 O7 <sup>iv</sup> | 78.81(12)  | O8 <sup>i</sup> Ce1 O4 <sup>ii</sup>  | 140.58(12) |
| O2 Ce1 O4 <sup>ii</sup>                | 70.68(11)  | O3 Ce1 O7 <sup>iv</sup>                 | 73.4(3)    | O4 <sup>iii</sup> Ce1 O8 <sup>i</sup>  | 86.50(12)  | O9 Ce1 O4 <sup>ii</sup>               | 107.1(2)   |
| O2 Ce1 O5 <sup>ii</sup>                | 73.91(13)  | O3 Ce1 O8 <sup>i</sup>                  | 70.1(3)    | O4 <sup>iii</sup> Ce1 O9               | 143.45(19) | O9 Ce1 O5 <sup>ii</sup>               | 77.7(2)    |
| O2 Ce1 O7 <sup>iv</sup>                | 134.73(12) | O3 Ce1 O9                               | 73.6(4)    | O4 <sup>iii</sup> Ce1 O11              | 148.6(4)   | O9 Ce1 O8 <sup>i</sup>                | 108.0(2)   |
| O2 Ce1 O8 <sup>i</sup>                 | 70.55(13)  | O3A Ce1 O2                              | 135.5(9)   | O5 <sup>ii</sup> Ce1 O4 <sup>ii</sup>  | 49.45(11)  | O11 Ce1 O2                            | 134.6(4)   |
| Compound 2                             |            |                                         |            |                                        |            |                                       |            |
| Pr1 O1                                 | 2.457(4)   | Pr1 O5 <sup>iii</sup>                   | 2.466(3)   | Pr1 O7 <sup>v</sup>                    | 2.442(3)   | Pr1 O8                                | 2.447(4)   |
| Pr1 O2                                 | 2.652(4)   | Pr1 O6 <sup>iv</sup>                    | 2.550(4)   | Pr1 O7 <sup>iv</sup>                   | 2.684(3)   | Pr1 O9                                | 2.516(5)   |
| Pr1 O4 <sup>ii</sup>                   | 2.444(3)   |                                         |            |                                        |            |                                       |            |
| O1 Pr1 O2                              | 51.09(12)  | O4 <sup>ii</sup> Pr1 O6 <sup>iv</sup>   | 74.08(13)  | O6 <sup>iv</sup> Pr1 O7 <sup>iv</sup>  | 49.81(11)  | O8 Pr1 O1                             | 90.64(16)  |
| O1 Pr1 O5 <sup>iii</sup>               | 140.62(14) | O4 <sup>ii</sup> Pr1 O7 <sup>iv</sup>   | 70.74(11)  | O7 <sup>v</sup> Pr1 O1                 | 135.87(12) | O8 Pr1 O2                             | 69.69(14)  |
| O1 Pr1 O6 <sup>iv</sup>                | 81.98(13)  | O4 <sup>ii</sup> Pr1 O8                 | 133.82(15) | O7 <sup>v</sup> Pr1 O2                 | 86.06(12)  | O8 Pr1 O5 <sup>iii</sup>              | 74.08(15)  |
| O1 Pr1 O7 <sup>iv</sup>                | 128.78(13) | O4 <sup>ii</sup> Pr1 O9                 | 141.36(14) | O7 <sup>v</sup> Pr1 O4 <sup>ii</sup>   | 73.23(12)  | O8 Pr1 O6 <sup>iv</sup>               | 149.87(16) |
| O1 Pr1 O9                              | 71.48(15)  | O5 <sup>iii</sup> Pr1 O2                | 142.24(13) | O7 <sup>v</sup> Pr1 O5 <sup>iii</sup>  | 78.80(12)  | O8 Pr1 O7 <sup>iv</sup>               | 139.30(14) |
| O2 Pr1 O7 <sup>iv</sup>                | 140.11(12) | O5 <sup>iii</sup> Pr1 O6 <sup>iv</sup>  | 93.32(14)  | O7 <sup>v</sup> Pr1 O6 <sup>iv</sup>   | 122.83(12) | O8 Pr1 O9                             | 74.65(18)  |
| O4 <sup>ii</sup> Pr1 O1                | 81.38(14)  | O5 <sup>iii</sup> Pr1 O7 <sup>iv</sup>  | 68.51(12)  | O7 <sup>v</sup> Pr1 O7 <sup>iv</sup>   | 75.50(12)  | O9 Pr1 O2                             | 109.61(16) |
| O4 <sup>ii</sup> Pr1 O2                | 70.14(13)  | O5 <sup>iii</sup> Pr1 O9                | 69.53(14)  | O7 <sup>v</sup> Pr1 O8                 | 82.21(15)  | O9 Pr1 O6 <sup>iv</sup>               | 75.31(16)  |
| O4 <sup>ii</sup> Pr1 O5 <sup>iii</sup> | 134.98(12) | O6 <sup>iv</sup> Pr1 O2                 | 123.65(12) | O7 <sup>v</sup> Pr1 O9                 | 144.72(13) | O9 Pr1 O7 <sup>iv</sup>               | 105.63(16) |
| Compound 3                             |            |                                         |            |                                        |            |                                       |            |
| Sm4 O1 <sup>i</sup>                    | 2.432(4)   | Sm4 O4 <sup>iv</sup>                    | 2.393(4)   | Sm4 O6 <sup>ii</sup>                   | 2.629(4)   | Sm4 O8                                | 2.405(5)   |
| Sm4 O2                                 | 2.402(4)   | Sm4 O4 <sup>iii</sup>                   | 2.678(4)   | Sm4 O7 <sup>ii</sup>                   | 2.421(4)   | Sm4 O9                                | 2.494(5)   |
| Sm4 O3 <sup>iii</sup>                  | 2.477(4)   |                                         |            |                                        |            |                                       |            |
| O1 <sup>i</sup> Sm4 O3 <sup>iii</sup>  | 91.99(15)  | O2 Sm4 O9                               | 140.90(15) | O4 <sup>iv</sup> Sm4 O8                | 82.12(16)  | O7 <sup>ii</sup> Sm4 O6 <sup>ii</sup> | 51.51(14)  |
| O1 <sup>i</sup> Sm4 O4 <sup>iii</sup>  | 68.53(13)  | O2 Sm4 O6 <sup>ii</sup>                 | 70.42(14)  | O4 <sup>iv</sup> Sm4 O4 <sup>iii</sup> | 76.01(14)  | O8 Sm4 O3 <sup>iii</sup>              | 148.25(16) |
| O1 <sup>i</sup> Sm4 O9                 | 69.04(15)  | O3 <sup>iii</sup> Sm4 O4 <sup>iii</sup> | 50.38(12)  | O4 <sup>iv</sup> Sm4 O6 <sup>ii</sup>  | 84.24(13)  | O8 Sm4 O4 <sup>iii</sup>              | 139.78(16) |
| O1 <sup>i</sup> Sm4 O6 <sup>ii</sup>   | 141.58(15) | O3 <sup>iii</sup> Sm4 O9                | 74.18(17)  | O4 <sup>iv</sup> Sm4 O9                | 144.51(15) | O8 Sm4 O9                             | 74.15(17)  |
| O2 Sm4 O7 <sup>ii</sup>                | 80.66(15)  | O3 <sup>iii</sup> Sm4 O6 <sup>ii</sup>  | 125.59(13) | O6 <sup>ii</sup> Sm4 O4 <sup>iii</sup> | 139.79(14) | O8 Sm4 O6 <sup>ii</sup>               | 68.78(16)  |

|    |     |                   |            |                  |     |                   |            |                  |     |                   |            |    |     |                   |            |
|----|-----|-------------------|------------|------------------|-----|-------------------|------------|------------------|-----|-------------------|------------|----|-----|-------------------|------------|
| O2 | Sm4 | O1 <sup>i</sup>   | 135.41(13) | O4 <sup>iv</sup> | Sm4 | O2                | 74.02(14)  | O7 <sup>ii</sup> | Sm4 | O1 <sup>i</sup>   | 140.81(15) | O8 | Sm4 | O7 <sup>ii</sup>  | 89.72(19)  |
| O2 | Sm4 | O3 <sup>iii</sup> | 74.97(15)  | O4 <sup>iv</sup> | Sm4 | O7 <sup>ii</sup>  | 134.52(14) | O7 <sup>ii</sup> | Sm4 | O3 <sup>iii</sup> | 82.79(15)  | O8 | Sm4 | O1 <sup>i</sup>   | 74.62(17)  |
| O2 | Sm4 | O8                | 134.24(16) | O4 <sup>iv</sup> | Sm4 | O1 <sup>i</sup>   | 79.54(14)  | O7 <sup>ii</sup> | Sm4 | O4 <sup>iii</sup> | 129.39(15) | O9 | Sm4 | O4 <sup>iii</sup> | 105.96(15) |
| O2 | Sm4 | O4 <sup>iii</sup> | 70.60(13)  | O4 <sup>iv</sup> | Sm4 | O3 <sup>iii</sup> | 124.34(14) | O7 <sup>ii</sup> | Sm4 | O9                | 72.19(16)  | O9 | Sm4 | O6 <sup>ii</sup>  | 110.29(16) |

#### Compound 4

|                   |                   |                   |           |                   |          |                  |                   |                   |     |                   |           |                   |     |                  |          |
|-------------------|-------------------|-------------------|-----------|-------------------|----------|------------------|-------------------|-------------------|-----|-------------------|-----------|-------------------|-----|------------------|----------|
| Eu1               | O1                | 2.475(6)          | Eu1       | O6 <sup>iv</sup>  | 2.594(6) | Eu2              | O2                | 2.690(8)          | Eu2 | O6 <sup>iv</sup>  | 2.610(7)  |                   |     |                  |          |
| Eu1               | O2 <sup>i</sup>   | 2.370(5)          | Eu1       | O7 <sup>iv</sup>  | 2.412(7) | Eu2              | O2 <sup>i</sup>   | 2.388(7)          | Eu2 | O7 <sup>iv</sup>  | 2.404(8)  |                   |     |                  |          |
| Eu1               | O2                | 2.711(6)          | Eu1       | O8                | 2.485(8) | Eu2              | O3 <sup>ii</sup>  | 2.439(7)          | Eu2 | O8                | 2.480(9)  |                   |     |                  |          |
| Eu1               | O3 <sup>ii</sup>  | 2.433(5)          | Eu1       | O9                | 2.427(9) | Eu2              | O4 <sup>iii</sup> | 2.396(7)          | Eu2 | O9                | 2.458(11) |                   |     |                  |          |
| Eu1               | O4 <sup>iii</sup> | 2.410(6)          | Eu2       | O1                | 2.442(8) |                  |                   |                   |     |                   |           |                   |     |                  |          |
| O1                | Eu1               | O2                | 49.10(19) | O4 <sup>iii</sup> | Eu1      | O6 <sup>iv</sup> | 71.25(18)         | O1                | Eu2 | O2                | 49.6(2)   | O4 <sup>iii</sup> | Eu2 | O2               | 70.4(2)  |
| O1                | Eu1               | O6 <sup>iv</sup>  | 126.8(2)  | O4 <sup>iii</sup> | Eu1      | O7 <sup>iv</sup> | 79.4(2)           | O1                | Eu2 | O6 <sup>iv</sup>  | 127.6(3)  | O4 <sup>iii</sup> | Eu2 | O3 <sup>ii</sup> | 135.0(3) |
| O1                | Eu1               | O8                | 73.9(3)   | O4 <sup>iii</sup> | Eu1      | O8               | 140.0(2)          | O1                | Eu2 | O8                | 74.6(3)   | O4 <sup>iii</sup> | Eu2 | O6 <sup>iv</sup> | 71.2(2)  |
| O2 <sup>i</sup>   | Eu1               | O1                | 123.7(2)  | O4 <sup>iii</sup> | Eu1      | O9               | 134.5(2)          | O1                | Eu2 | O9                | 148.7(3)  | O4 <sup>iii</sup> | Eu2 | O7 <sup>iv</sup> | 79.8(3)  |
| O2 <sup>i</sup>   | Eu1               | O2                | 76.21(19) | O6 <sup>iv</sup>  | Eu1      | O2               | 140.0(2)          | O2 <sup>i</sup>   | Eu2 | O1                | 124.4(3)  | O4 <sup>iii</sup> | Eu2 | O8               | 141.2(3) |
| O2 <sup>i</sup>   | Eu1               | O3 <sup>ii</sup>  | 80.12(19) | O7 <sup>iv</sup>  | Eu1      | O1               | 82.5(2)           | O2 <sup>i</sup>   | Eu2 | O2                | 76.3(2)   | O4 <sup>iii</sup> | Eu2 | O9               | 133.5(3) |
| O2 <sup>i</sup>   | Eu1               | O4 <sup>iii</sup> | 74.35(19) | O7 <sup>iv</sup>  | Eu1      | O2               | 127.1(2)          | O2 <sup>i</sup>   | Eu2 | O3 <sup>ii</sup>  | 79.6(2)   | O6 <sup>iv</sup>  | Eu2 | O2               | 140.3(3) |
| O2 <sup>i</sup>   | Eu1               | O6 <sup>iv</sup>  | 84.9(2)   | O7 <sup>iv</sup>  | Eu1      | O3 <sup>ii</sup> | 141.5(2)          | O2 <sup>i</sup>   | Eu2 | O4 <sup>iii</sup> | 74.3(2)   | O7 <sup>iv</sup>  | Eu2 | O1               | 83.4(3)  |
| O2 <sup>i</sup>   | Eu1               | O7 <sup>iv</sup>  | 134.9(2)  | O7 <sup>iv</sup>  | Eu1      | O6 <sup>iv</sup> | 51.8(2)           | O2 <sup>i</sup>   | Eu2 | O6 <sup>iv</sup>  | 84.2(3)   | O7 <sup>iv</sup>  | Eu2 | O2               | 128.5(3) |
| O2 <sup>i</sup>   | Eu1               | O8                | 145.2(2)  | O7 <sup>iv</sup>  | Eu1      | O8               | 71.9(2)           | O2 <sup>i</sup>   | Eu2 | O7 <sup>iv</sup>  | 134.3(3)  | O7 <sup>iv</sup>  | Eu2 | O3 <sup>ii</sup> | 141.6(3) |
| O2 <sup>i</sup>   | Eu1               | O9                | 81.2(2)   | O7 <sup>iv</sup>  | Eu1      | O9               | 92.3(3)           | O2 <sup>i</sup>   | Eu2 | O8                | 144.2(3)  | O7 <sup>iv</sup>  | Eu2 | O6 <sup>iv</sup> | 51.7(2)  |
| O3 <sup>ii</sup>  | Eu1               | O1                | 89.2(2)   | O8                | Eu1      | O2               | 106.6(2)          | O2 <sup>i</sup>   | Eu2 | O9                | 80.2(3)   | O7 <sup>iv</sup>  | Eu2 | O8               | 72.1(3)  |
| O3 <sup>ii</sup>  | Eu1               | O2                | 67.89(19) | O8                | Eu1      | O6 <sup>iv</sup> | 108.9(3)          | O3 <sup>ii</sup>  | Eu2 | O1                | 89.9(3)   | O7 <sup>iv</sup>  | Eu2 | O9               | 91.7(3)  |
| O3 <sup>ii</sup>  | Eu1               | O6 <sup>iv</sup>  | 143.0(2)  | O9                | Eu1      | O1               | 148.5(3)          | O3 <sup>ii</sup>  | Eu2 | O2                | 68.2(2)   | O8                | Eu2 | O2               | 107.4(3) |
| O3 <sup>ii</sup>  | Eu1               | O8                | 69.7(2)   | O9                | Eu1      | O2               | 139.6(2)          | O3 <sup>ii</sup>  | Eu2 | O6 <sup>iv</sup>  | 141.6(3)  | O8                | Eu2 | O6 <sup>iv</sup> | 108.6(3) |
| O4 <sup>iii</sup> | Eu1               | O1                | 75.2(2)   | O9                | Eu1      | O3 <sup>ii</sup> | 75.6(3)           | O3 <sup>ii</sup>  | Eu2 | O8                | 69.7(3)   | O9                | Eu2 | O2               | 139.0(3) |
| O4 <sup>iii</sup> | Eu1               | O2                | 69.81(19) | O9                | Eu1      | O6 <sup>iv</sup> | 68.8(2)           | O3 <sup>ii</sup>  | Eu2 | O9                | 74.9(3)   | O9                | Eu2 | O6 <sup>iv</sup> | 68.1(3)  |
| O4 <sup>iii</sup> | Eu1               | O3 <sup>ii</sup>  | 134.5(2)  | O9                | Eu1      | O8               | 75.0(3)           | O4 <sup>iii</sup> | Eu2 | O1                | 76.1(3)   | O9                | Eu2 | O8               | 74.5(3)  |

#### Compound 5

|     |     |                   |            |                  |          |                   |                   |                   |     |                   |            |    |     |                   |            |
|-----|-----|-------------------|------------|------------------|----------|-------------------|-------------------|-------------------|-----|-------------------|------------|----|-----|-------------------|------------|
| Gd4 | O1  | 2.605(5)          | Gd4        | O4 <sup>v</sup>  | 2.362(4) | Gd4               | O5 <sup>iv</sup>  | 2.454(5)          | Gd4 | O7 <sup>ii</sup>  | 2.380(5)   |    |     |                   |            |
| Gd4 | O2  | 2.387(5)          | Gd4        | O4 <sup>iv</sup> | 2.656(5) | Gd4               | O6 <sup>iii</sup> | 2.400(4)          | Gd4 | O8                | 2.373(5)   |    |     |                   |            |
| Gd4 | O9  | 2.467(6)          |            |                  |          |                   |                   |                   |     |                   |            |    |     |                   |            |
| O1  | Gd4 | O4 <sup>iv</sup>  | 138.90(17) | O4 <sup>v</sup>  | Gd4      | O6 <sup>iii</sup> | 79.91(16)         | O6 <sup>iii</sup> | Gd4 | O4 <sup>iv</sup>  | 68.04(15)  | O8 | Gd4 | O2                | 91.5(2)    |
| O2  | Gd4 | O6 <sup>iii</sup> | 140.91(17) | O4 <sup>v</sup>  | Gd4      | O5 <sup>iv</sup>  | 124.56(16)        | O6 <sup>iii</sup> | Gd4 | O9                | 69.31(17)  | O8 | Gd4 | O7 <sup>ii</sup>  | 133.41(19) |
| O2  | Gd4 | O5 <sup>iv</sup>  | 81.78(17)  | O4 <sup>v</sup>  | Gd4      | O4 <sup>iv</sup>  | 75.57(16)         | O6 <sup>iii</sup> | Gd4 | O1                | 143.26(17) | O8 | Gd4 | O6 <sup>iii</sup> | 75.60(19)  |
| O2  | Gd4 | O4 <sup>iv</sup>  | 128.30(16) | O4 <sup>v</sup>  | Gd4      | O1                | 84.58(16)         | O7 <sup>ii</sup>  | Gd4 | O2                | 79.81(17)  | O8 | Gd4 | O5 <sup>iv</sup>  | 148.93(19) |
| O2  | Gd4 | O1                | 51.93(16)  | O4 <sup>v</sup>  | Gd4      | O9                | 144.62(17)        | O7 <sup>ii</sup>  | Gd4 | O6 <sup>iii</sup> | 135.21(16) | O8 | Gd4 | O4 <sup>iv</sup>  | 139.36(18) |
| O2  | Gd4 | O9                | 71.73(18)  | O5 <sup>iv</sup> | Gd4      | O4 <sup>iv</sup>  | 50.75(14)         | O7 <sup>ii</sup>  | Gd4 | O5 <sup>iv</sup>  | 75.42(16)  | O8 | Gd4 | O1                | 69.14(19)  |

|                 |     |                  |            |                   |     |                  |            |                  |     |                  |            |    |     |                  |            |
|-----------------|-----|------------------|------------|-------------------|-----|------------------|------------|------------------|-----|------------------|------------|----|-----|------------------|------------|
| O4 <sup>v</sup> | Gd4 | O8               | 80.89(19)  | O5 <sup>iv</sup>  | Gd4 | O1               | 125.31(16) | O7 <sup>ii</sup> | Gd4 | O4 <sup>iv</sup> | 70.37(15)  | O8 | Gd4 | O9               | 75.0(2)    |
| O4 <sup>v</sup> | Gd4 | O2               | 135.13(16) | O5 <sup>iv</sup>  | Gd4 | O9               | 74.05(19)  | O7 <sup>ii</sup> | Gd4 | O1               | 69.75(17)  | O9 | Gd4 | O4 <sup>iv</sup> | 107.05(18) |
| O4 <sup>v</sup> | Gd4 | O7 <sup>ii</sup> | 74.35(15)  | O6 <sup>iii</sup> | Gd4 | O5 <sup>iv</sup> | 90.58(17)  | O7 <sup>ii</sup> | Gd4 | O9               | 140.59(18) | O9 | Gd4 | O1               | 109.8(2)   |

### Compound 6

|                  |      |                   |            |                   |          |                   |                   |                  |     |                   |            |      |     |                   |          |
|------------------|------|-------------------|------------|-------------------|----------|-------------------|-------------------|------------------|-----|-------------------|------------|------|-----|-------------------|----------|
| Dy1              | O0AA | 2.447(6)          | Dy1        | O1                | 2.300(3) | Dy1               | O5 <sup>iii</sup> | 2.408(3)         | Dy1 | O7 <sup>ii</sup>  | 2.839(3)   |      |     |                   |          |
| Dy1              | O1AA | 2.447(6)          | Dy1        | O2 <sup>iv</sup>  | 2.318(4) | Dy1               | O6 <sup>ii</sup>  | 2.346(3)         | Dy1 | O7 <sup>i</sup>   | 2.276(3)   |      |     |                   |          |
| Dy1              | O2AA | 2.215(12)         | Dy1        | O4 <sup>iii</sup> | 2.399(3) |                   |                   |                  |     |                   |            |      |     |                   |          |
| O1               | Dy1  | O7 <sup>ii</sup>  | 66.12(13)  | O2 <sup>iv</sup>  | Dy1      | O0AA              | 139.3(2)          | O6 <sup>ii</sup> | Dy1 | O4 <sup>iii</sup> | 133.05(14) | O0AA | Dy1 | O7 <sup>ii</sup>  | 112.6(2) |
| O1               | Dy1  | O6 <sup>ii</sup>  | 80.88(16)  | O2 <sup>iv</sup>  | Dy1      | O1AA              | 141.1(2)          | O6 <sup>ii</sup> | Dy1 | O0AA              | 72.5(2)    | O0AA | Dy1 | O1AA              | 69.2(3)  |
| O1               | Dy1  | O5 <sup>iii</sup> | 142.59(13) | O4 <sup>iii</sup> | Dy1      | O7 <sup>ii</sup>  | 142.46(15)        | O6 <sup>ii</sup> | Dy1 | O1AA              | 137.4(2)   | O2AA | Dy1 | O1                | 77.7(3)  |
| O1               | Dy1  | O2 <sup>iv</sup>  | 131.09(12) | O4 <sup>iii</sup> | Dy1      | O5 <sup>iii</sup> | 54.26(13)         | O7 <sup>i</sup>  | Dy1 | O7 <sup>ii</sup>  | 76.21(11)  | O2AA | Dy1 | O4 <sup>iii</sup> | 73.6(4)  |
| O1               | Dy1  | O4 <sup>iii</sup> | 143.58(17) | O4 <sup>iii</sup> | Dy1      | O0AA              | 100.2(2)          | O7 <sup>i</sup>  | Dy1 | O6 <sup>ii</sup>  | 125.52(11) | O2AA | Dy1 | O7 <sup>ii</sup>  | 143.0(3) |
| O1               | Dy1  | O0AA              | 75.12(17)  | O4 <sup>iii</sup> | Dy1      | O1AA              | 72.7(2)           | O7 <sup>i</sup>  | Dy1 | O5 <sup>iii</sup> | 138.75(13) | O2AA | Dy1 | O7 <sup>i</sup>   | 104.2(4) |
| O1               | Dy1  | O1AA              | 71.9(2)    | O5 <sup>iii</sup> | Dy1      | O7 <sup>ii</sup>  | 121.88(12)        | O7 <sup>i</sup>  | Dy1 | O2 <sup>iv</sup>  | 76.83(15)  | O2AA | Dy1 | O6 <sup>ii</sup>  | 119.0(4) |
| O2 <sup>iv</sup> | Dy1  | O7 <sup>ii</sup>  | 67.69(13)  | O5 <sup>iii</sup> | Dy1      | O0AA              | 68.23(18)         | O7 <sup>i</sup>  | Dy1 | O1                | 77.50(14)  | O2AA | Dy1 | O5 <sup>iii</sup> | 82.7(4)  |
| O2 <sup>iv</sup> | Dy1  | O6 <sup>ii</sup>  | 81.26(16)  | O5 <sup>iii</sup> | Dy1      | O1AA              | 100.9(2)          | O7 <sup>i</sup>  | Dy1 | O4 <sup>iii</sup> | 88.13(13)  | O2AA | Dy1 | O2 <sup>iv</sup>  | 149.2(3) |
| O2 <sup>iv</sup> | Dy1  | O5 <sup>iii</sup> | 77.66(13)  | O6 <sup>ii</sup>  | Dy1      | O7 <sup>ii</sup>  | 49.32(10)         | O7 <sup>i</sup>  | Dy1 | O0AA              | 143.8(2)   | O2AA | Dy1 | O0AA              | 46.9(4)  |
| O2 <sup>iv</sup> | Dy1  | O4 <sup>iii</sup> | 75.65(16)  | O6 <sup>ii</sup>  | Dy1      | O5 <sup>iii</sup> | 81.29(12)         | O7 <sup>i</sup>  | Dy1 | O1AA              | 80.1(2)    |      |     |                   |          |

### Compound 7

|                  |                  |                   |            |                   |          |                  |                  |                   |     |                  |           |                  |     |                  |            |
|------------------|------------------|-------------------|------------|-------------------|----------|------------------|------------------|-------------------|-----|------------------|-----------|------------------|-----|------------------|------------|
| Ho1              | O1               | 2.263(4)          | Ho1        | O3 <sup>i</sup>   | 2.336(4) | Ho1              | O6 <sup>ii</sup> | 2.384(4)          | Ho1 | O9               | 2.451(7)  |                  |     |                  |            |
| Ho1              | O1 <sup>i</sup>  | 2.837(4)          | Ho1        | O4 <sup>iii</sup> | 2.294(4) | Ho1              | O8               | 2.416(6)          | Ho1 | O10              | 2.333(9)  |                  |     |                  |            |
| Ho1              | O2 <sup>ii</sup> | 2.396(4)          | Ho1        | O5 <sup>iv</sup>  | 2.298(4) |                  |                  |                   |     |                  |           |                  |     |                  |            |
| O1               | Ho1              | O1 <sup>i</sup>   | 76.30(13)  | O2 <sup>ii</sup>  | Ho1      | O9               | 68.0(2)          | O4 <sup>iii</sup> | Ho1 | O8               | 72.4(2)   | O6 <sup>ii</sup> | Ho1 | O1 <sup>i</sup>  | 142.70(17) |
| O1               | Ho1              | O2 <sup>ii</sup>  | 139.33(15) | O3 <sup>i</sup>   | Ho1      | O1 <sup>i</sup>  | 49.33(11)        | O4 <sup>iii</sup> | Ho1 | O9               | 75.1(2)   | O6 <sup>ii</sup> | Ho1 | O2 <sup>ii</sup> | 54.52(15)  |
| O1               | Ho1              | O3 <sup>i</sup>   | 125.63(13) | O3 <sup>i</sup>   | Ho1      | O2 <sup>ii</sup> | 81.20(14)        | O4 <sup>iii</sup> | Ho1 | O10              | 76.9(4)   | O6 <sup>ii</sup> | Ho1 | O8               | 72.0(2)    |
| O1               | Ho1              | O4 <sup>iii</sup> | 77.26(16)  | O3 <sup>i</sup>   | Ho1      | O6 <sup>ii</sup> | 133.32(15)       | O5 <sup>iv</sup>  | Ho1 | O1 <sup>i</sup>  | 67.35(14) | O6 <sup>ii</sup> | Ho1 | O9               | 99.7(2)    |
| O1               | Ho1              | O5 <sup>iv</sup>  | 77.29(17)  | O3 <sup>i</sup>   | Ho1      | O8               | 138.2(3)         | O5 <sup>iv</sup>  | Ho1 | O2 <sup>ii</sup> | 77.97(14) | O8               | Ho1 | O1 <sup>i</sup>  | 135.2(2)   |
| O1               | Ho1              | O6 <sup>ii</sup>  | 88.37(15)  | O3 <sup>i</sup>   | Ho1      | O9               | 72.8(3)          | O5 <sup>iv</sup>  | Ho1 | O3 <sup>i</sup>  | 81.18(17) | O8               | Ho1 | O9               | 69.8(4)    |
| O1               | Ho1              | O8                | 78.9(3)    | O4 <sup>iii</sup> | Ho1      | O1 <sup>i</sup>  | 66.14(15)        | O5 <sup>iv</sup>  | Ho1 | O6 <sup>ii</sup> | 76.25(18) | O9               | Ho1 | O1 <sup>i</sup>  | 113.0(2)   |
| O1               | Ho1              | O9                | 143.1(3)   | O4 <sup>iii</sup> | Ho1      | O2 <sup>ii</sup> | 142.21(15)       | O5 <sup>iv</sup>  | Ho1 | O8               | 140.5(3)  | O10              | Ho1 | O1 <sup>i</sup>  | 142.0(4)   |
| O1               | Ho1              | O10               | 104.4(6)   | O4 <sup>iii</sup> | Ho1      | O3 <sup>i</sup>  | 80.59(18)        | O5 <sup>iv</sup>  | Ho1 | O9               | 139.6(2)  | O10              | Ho1 | O6 <sup>ii</sup> | 74.5(4)    |
| O2 <sup>ii</sup> | Ho1              | O1 <sup>i</sup>   | 121.79(14) | O4 <sup>iii</sup> | Ho1      | O5 <sup>iv</sup> | 130.86(14)       | O5 <sup>iv</sup>  | Ho1 | O10              | 150.6(4)  | O10              | Ho1 | O9               | 45.6(6)    |
| O2 <sup>ii</sup> | Ho1              | O8                | 101.2(3)   | O4 <sup>iii</sup> | Ho1      | O6 <sup>ii</sup> | 143.44(19)       |                   |     |                  |           |                  |     |                  |            |

Symmetry codes for **1**: (i) 1-x, y, 0.5-z; (ii) 0.5-x, -0.5+y, 0.5-z; (iii) x, 1-y, 0.5+z; (iv) 0.5-x, 0.5-y, 1-z; (v) x, 1-y, -0.5+z; (vi) 0.5-x, 0.5+y, 0.5-z. For **2**: (i) 0.5-x, 0.5-y, 1-z; (ii) 1-x, y, 0.5-z; (iii) -0.5+x, 0.5-y, 0.5+z; (iv) -0.5+x, 0.5+y, z; (v) 1-x, -y, 1-z; (vi) 0.5+x, 0.5-y, -0.5+z; (vii) 0.5+x, -0.5+y, z. For **3**: (i) 0.5-x, 0.5-y, 1-z; (ii) 1-x, y, 0.5-z; (iii) 0.5-x, -0.5+y, 0.5-z; (iv) x, 1-y, 0.5+z; (v) 0.5-x, 0.5+y, 0.5-z; (vi) x, 1-y, -0.5+z. For **4**: (i) 0.5-x, -0.5-y, 1-z; (ii) x, -y, -0.5+z; (iii) 0.5-x, -0.5+y, 1.5-z; (iv) -0.5+x, -0.5+y, z; (v) x, -y, 0.5+z; (vi) 0.5-x, 0.5+y, 1.5-z; (vii) 0.5+x, 0.5+y, z. For **5**: (i) 1.5-x, 1.5-y, 1-z; (ii) 1-x, y, 1.5-z; (iii) 0.5+x, 1.5-y,

-0.5+z; (iv)  $0.5+x, 0.5+y, z$ ; (v)  $1-x, 1-y, 1-z$ ; (vi)  $-0.5+x, 1.5-y, 0.5+z$ ; (vii)  $-0.5+x, -0.5+y, z$ . For 6: (i)  $0.33333+y, 0.66667-x+y, 1.66667-z$ ; (ii)  $1-y, 1+x-y, z$ ; (iii)  $0.66667-x+y, 1.33333-x, 0.33333+z$ ; (iv)  $1.33333-x, 1.66667-y, 1.66667-z$ ; (v)  $0.33333+x-y, -0.33333+x, 1.66667-z$ ; (vi)  $-x+y, 1-x, z$ ; (vii)  $1.33333-y, 0.66667+x-y, -0.33333+z$ . For 7: (i)  $0.33333-x, 0.66667-y, 0.66667-z$ ; (ii)  $x-y, x, 1-z$ ; (iii)  $0.33333+y, 0.66667-x+y, 0.66667-z$ ; (iv)  $-y, x-y, z$ ; (v)  $y, -x+y, 1-z$ ; (vi)  $0.33333+x-y, -0.33333+x, 0.66667-z$ ; (vii)  $-x+y, -x, z$ .



Table S3. Comparison of various MOFs sensors for the detection of Fe<sup>3+</sup> and Cr<sub>2</sub>O<sub>7</sub><sup>2-</sup> ions.

|    | Analyte                                      | CPS-based fluorescent Materials                                                                                                      | Quenching constant<br>(K <sub>SV</sub> × 10 <sup>4</sup> M <sup>-1</sup> ) | Detection Limits<br>(DL) | Ref       |
|----|----------------------------------------------|--------------------------------------------------------------------------------------------------------------------------------------|----------------------------------------------------------------------------|--------------------------|-----------|
| 1  | Fe <sup>3+</sup>                             | {[Tb(CmdcpBr)(H <sub>2</sub> O) <sub>3</sub> ] <sub>2</sub> (NO <sub>3</sub> ) <sub>2</sub> ·5H <sub>2</sub> O} <sub>n</sub>         | 0.5532                                                                     | 1.5 mM                   | 2         |
| 2  |                                              | {[Eu(L)(HCOO)]·H <sub>2</sub> O} <sub>n</sub>                                                                                        | 0.7461                                                                     | 1 μM                     | 3         |
| 3  |                                              | [Eu <sub>2</sub> (2,3'-oba) <sub>3</sub> (phen) <sub>2</sub> ] <sub>n</sub>                                                          | 1.37                                                                       | 7.93 μM                  | 4         |
| 4  |                                              | [Tb(HMDIA)(H <sub>2</sub> O) <sub>3</sub> ]·H <sub>2</sub> O                                                                         | 1.73                                                                       |                          | 5         |
| 5  |                                              | [Eu(L <sub>1</sub> )(H <sub>2</sub> O)]·1.5H <sub>2</sub> O                                                                          | 6.607                                                                      | 0.87 μM                  | 6         |
|    |                                              | [[Tb(μ <sub>6</sub> -H <sub>2</sub> cpboda)(μ <sub>2</sub> -OH <sub>2</sub> ) <sub>2</sub> ]·H <sub>2</sub> O] <sub>n</sub>          | 6.50                                                                       | 0.84 μM                  | 7         |
| 6  |                                              | [Tb(TATAB)(H <sub>2</sub> O)]·2H <sub>2</sub> O                                                                                      | 12.5                                                                       | 0.0221 μM                | 8         |
| 7  |                                              | Eu-MOF                                                                                                                               | 13.4                                                                       | 3.69 μM                  | This work |
| 8  |                                              | [H <sub>2</sub> N(CH <sub>3</sub> ) <sub>2</sub> ] <sub>2</sub> [Zn <sub>2</sub> L(HPO <sub>3</sub> ) <sub>2</sub> ]                 | 39.6                                                                       | 0.116 μM                 | 9         |
| 9  |                                              | {[Zn <sub>3</sub> (HL) <sub>2</sub> H <sub>2</sub> O]·4H <sub>2</sub> O} <sub>n</sub>                                                | 50                                                                         |                          | 10        |
| 10 | CTGU-1 (Tb)                                  | 188.3                                                                                                                                | 0.001 μM                                                                   | 11                       |           |
|    |                                              |                                                                                                                                      |                                                                            |                          |           |
| 1  | Cr <sub>2</sub> O <sub>7</sub> <sup>2-</sup> | [Cd <sub>2</sub> (L <sub>1</sub> )(1,4-NDC) <sub>2</sub> ] <sub>n</sub>                                                              | 5.86                                                                       | 0.031 ppm                | 12        |
| 2  |                                              | [Zr <sub>6</sub> O <sub>4</sub> (OH) <sub>8</sub> (H <sub>2</sub> O) <sub>4</sub> (TCPP) <sub>4</sub> ]<br>□9DMF□3.5H <sub>2</sub> O | 5.91                                                                       |                          | 13        |
| 3  |                                              | {[Zn(H <sub>2</sub> BCA)(m-bib)]·H <sub>2</sub> O} <sub>n</sub>                                                                      | 5.3                                                                        | 0.07 μM                  | 14        |
|    |                                              | {[Zn <sub>2</sub> (tpeb) <sub>2</sub> (2,3-ndc) <sub>2</sub> ]·H <sub>2</sub> O} <sub>n</sub>                                        | 7.09                                                                       | 2.623 ppb                | 15        |
| 4  |                                              | [Zn(NH <sub>2</sub> -bdc)(4,4'-bpy)]                                                                                                 | 7.62                                                                       | 1.30 μM                  | 16        |
| 5  |                                              | [Ln(Hbptc)(H <sub>2</sub> O) <sub>4</sub> ]·H <sub>2</sub> O                                                                         | 10.4                                                                       | 2.36 μM                  | 17        |
| 6  | Eu-MOF                                       | 11.3                                                                                                                                 | 4.01 μM                                                                    | This work                |           |

Table S4. Comparison of various MOFs sensors for the detection of NZF and NFT.

|   | Analyte                                                              | CPs-based fluorescent Materials                                                                    | Quenching constant<br>( $K_{SV} \times 10^4 \text{ M}^{-1}$ ) | Detection Limits<br>(DL) | Ref       |
|---|----------------------------------------------------------------------|----------------------------------------------------------------------------------------------------|---------------------------------------------------------------|--------------------------|-----------|
| 1 | NZF                                                                  | $[\text{Zn}(\text{L})_2] \cdot \text{CH}_2\text{Cl}_2 \cdot \text{CH}_3\text{OH}$                  | 1.62                                                          |                          | 18        |
| 2 |                                                                      | $\{\text{Tb}(\text{TATMA})(\text{H}_2\text{O}) \cdot 2\text{H}_2\text{O}\}_n$                      | 3.00                                                          |                          | 19        |
| 3 |                                                                      | Eu-MOF                                                                                             | 4.38                                                          |                          | This work |
| 4 |                                                                      | $[\text{Cd}(\text{tpc})_{0.5}(\text{o-bimb})]_n$                                                   | 4.4                                                           |                          | 20        |
| 5 |                                                                      | $\{[\text{Cd}_3(\text{TDCPB}) \cdot 2\text{DMAc}] \cdot \text{DMAc} \cdot 4\text{H}_2\text{O}\}_n$ | 7.46                                                          |                          | 21        |
| 6 |                                                                      | $[\text{Zn}_2(\text{azdc})_2(\text{dpta})] \cdot (\text{DMF})_4$                                   | 13                                                            | 0.63 ppm                 | 22        |
| 7 |                                                                      | $[\text{Cd}(\text{H}_2\text{tpc})_{0.5}(\text{mbimb})(\text{Cl})]_n$                               | 21                                                            |                          | 20        |
|   |                                                                      |                                                                                                    |                                                               |                          |           |
| 1 | NFT                                                                  | $[\text{Zn}(\text{L})_2] \cdot \text{CH}_2\text{Cl}_2 \cdot \text{CH}_3\text{OH}$                  | 1.58                                                          |                          | 18        |
|   |                                                                      | $\{\text{Tb}(\text{TATMA})(\text{H}_2\text{O}) \cdot 2\text{H}_2\text{O}\}_n$                      | 3.35                                                          |                          | 19        |
|   |                                                                      | $[\text{Cd}(\text{tpc})_{0.5}(\text{o-bimb})]_n$                                                   | 3.4                                                           |                          | 20        |
| 2 |                                                                      | $[\text{TbL} \cdot 2\text{H}_2\text{O}]_n$                                                         | 5.26                                                          |                          | 23        |
| 3 |                                                                      | Eu-MOF                                                                                             | 5.29                                                          |                          | This work |
|   |                                                                      | $[\text{Zn}_2(\text{azdc})_2(\text{dpta})] \cdot (\text{DMF})_4$                                   | 7.14                                                          |                          | 22        |
| 6 |                                                                      | $\{[\text{Cd}_3(\text{TDCPB}) \cdot 2\text{DMAc}] \cdot \text{DMAc} \cdot 4\text{H}_2\text{O}\}_n$ | 10.5                                                          |                          | 21        |
| 7 | $[\text{Cd}(\text{H}_2\text{tpc})_{0.5}(\text{mbimb})(\text{Cl})]_n$ | 26                                                                                                 |                                                               | 20                       |           |

### 3. Figures

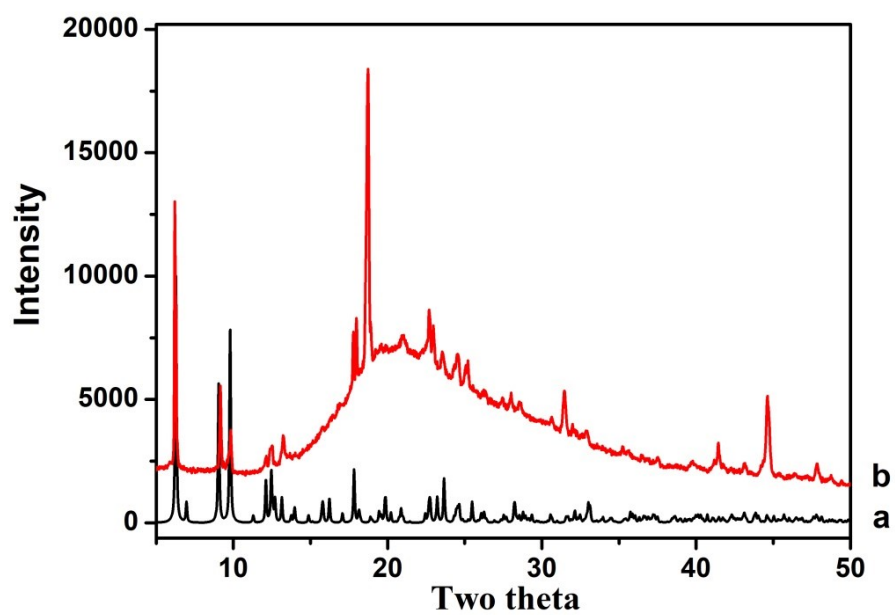

Figure S1. PXRD pattern of compound Ce(1).

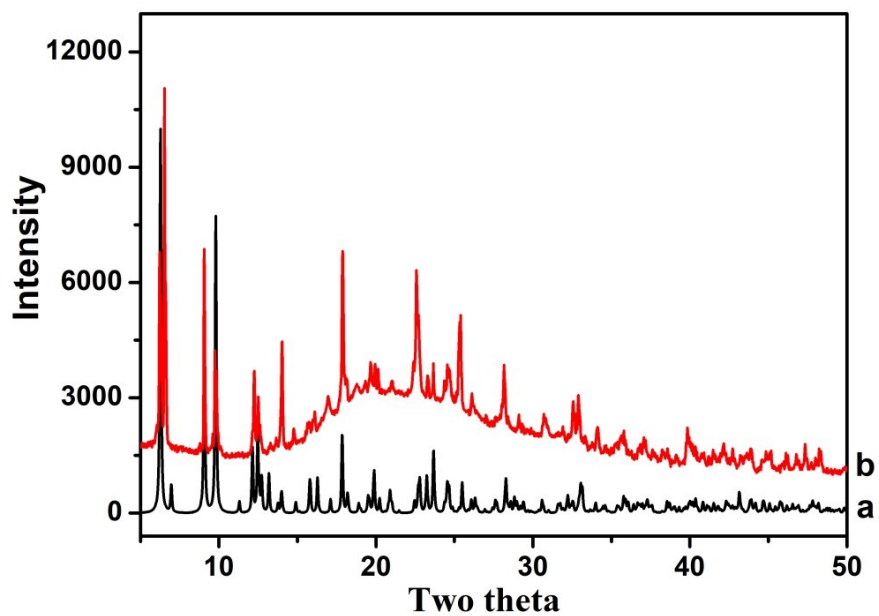

Figure S2. PXRD pattern of compound Pr(2).

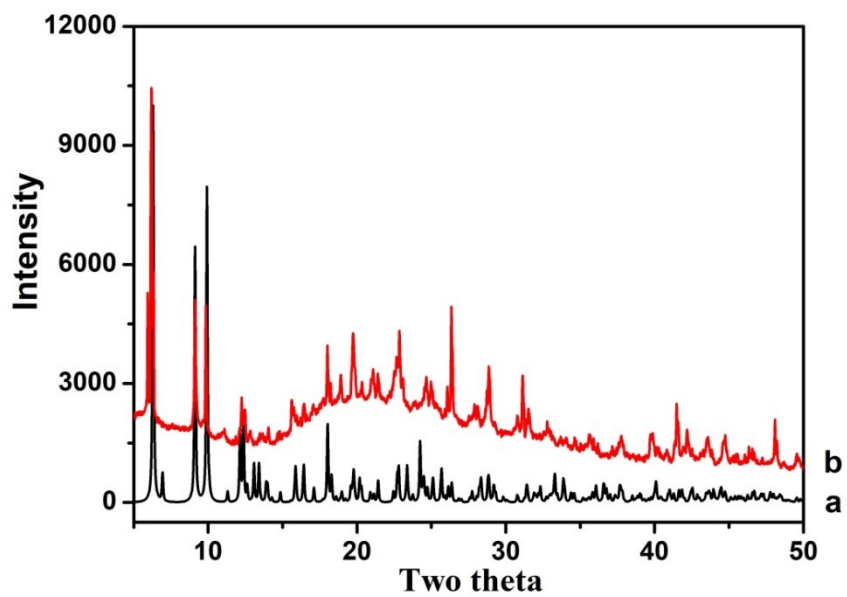

Figure S3. PXRD pattern of compound Sm(3).

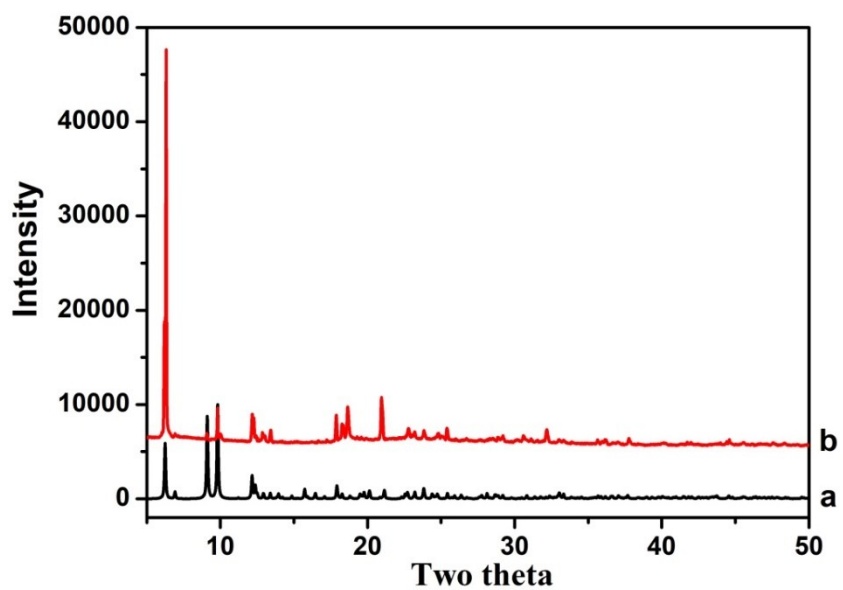

Figure S4. PXRD pattern of compound Eu(4).

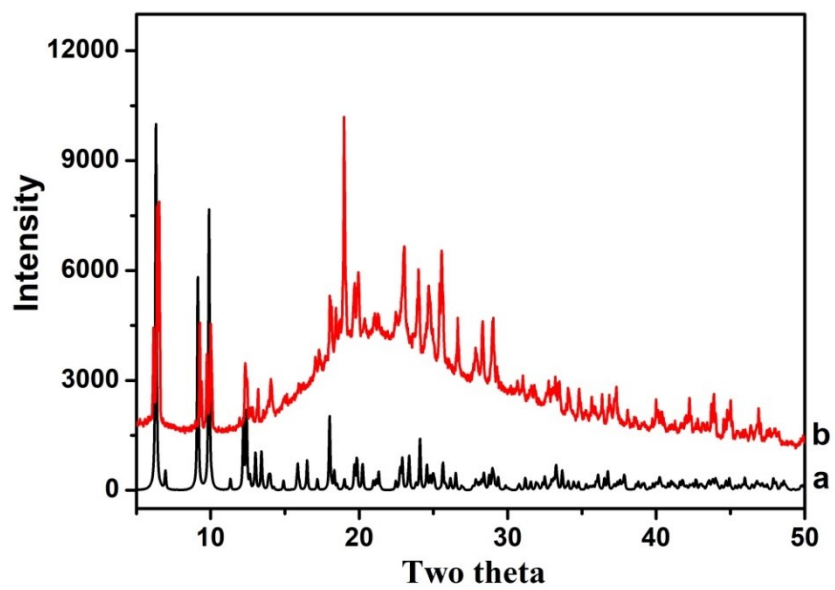

Figure S5. PXRD pattern of compound Gd(5).

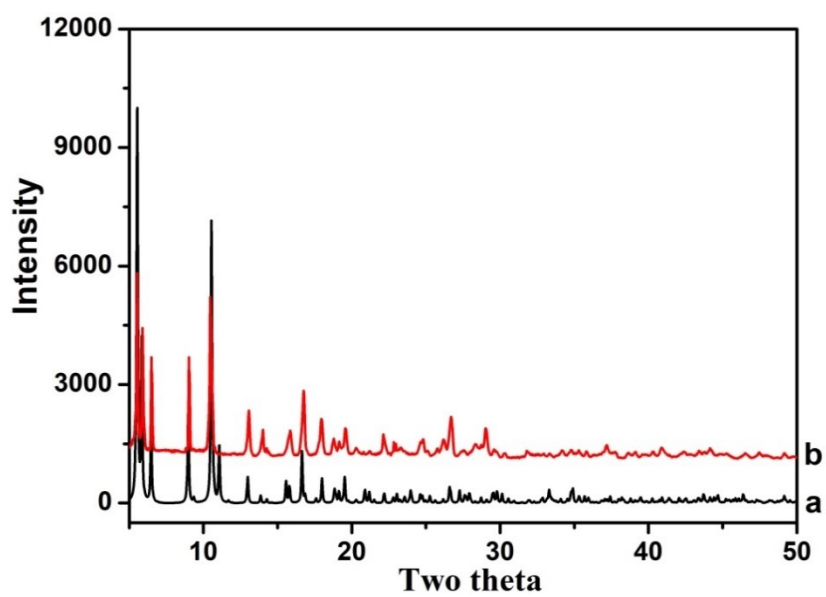

Figure S6. PXRD pattern of compound Dy(6).

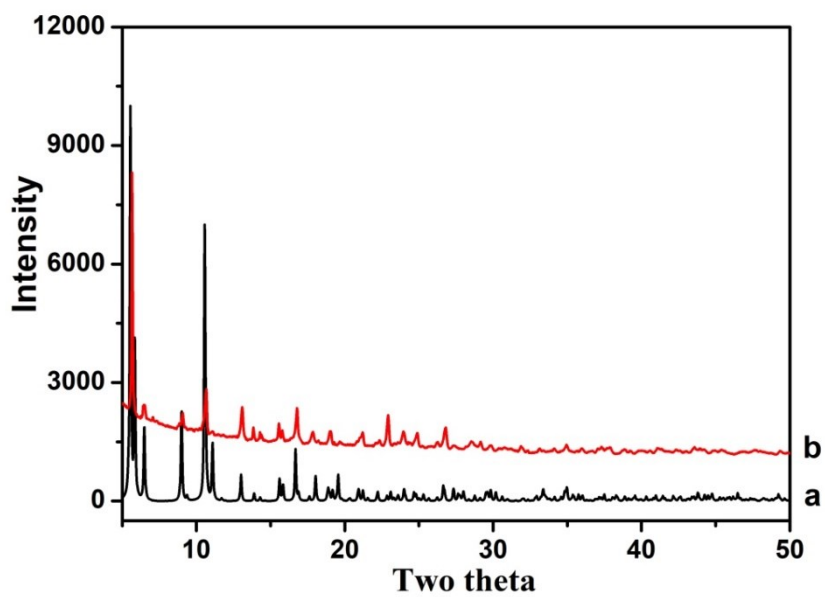

Figure S7. PXRD pattern of compound Ho(7).

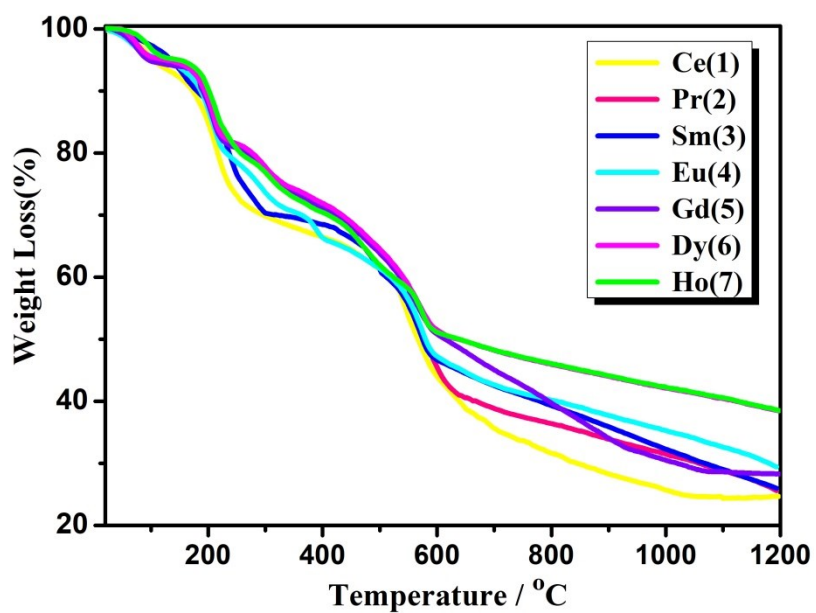

Figure S8. TGA curves for compounds 1-7.

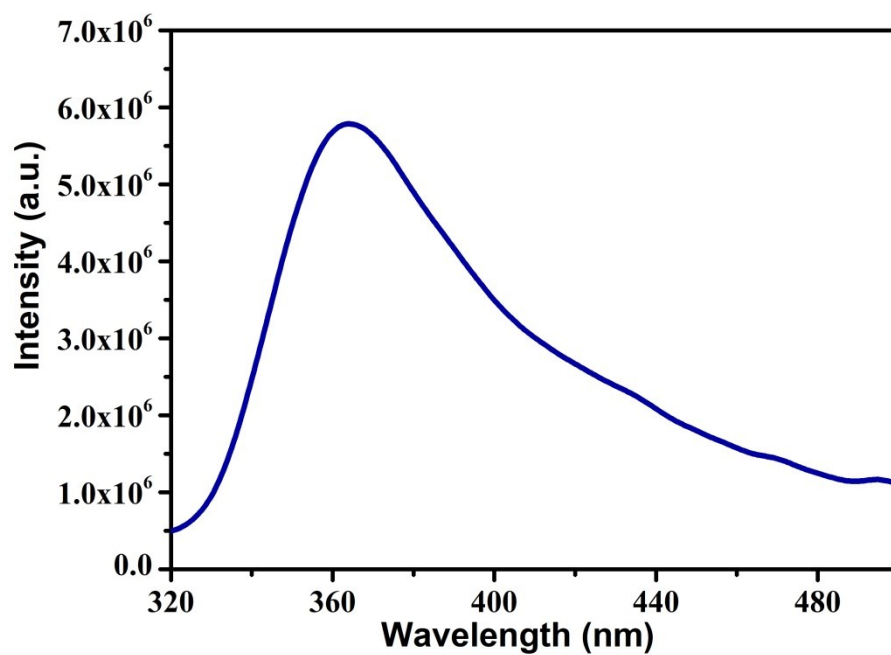

Figure S9. The solid state photoluminescence spectra for H<sub>3</sub>L ligand.

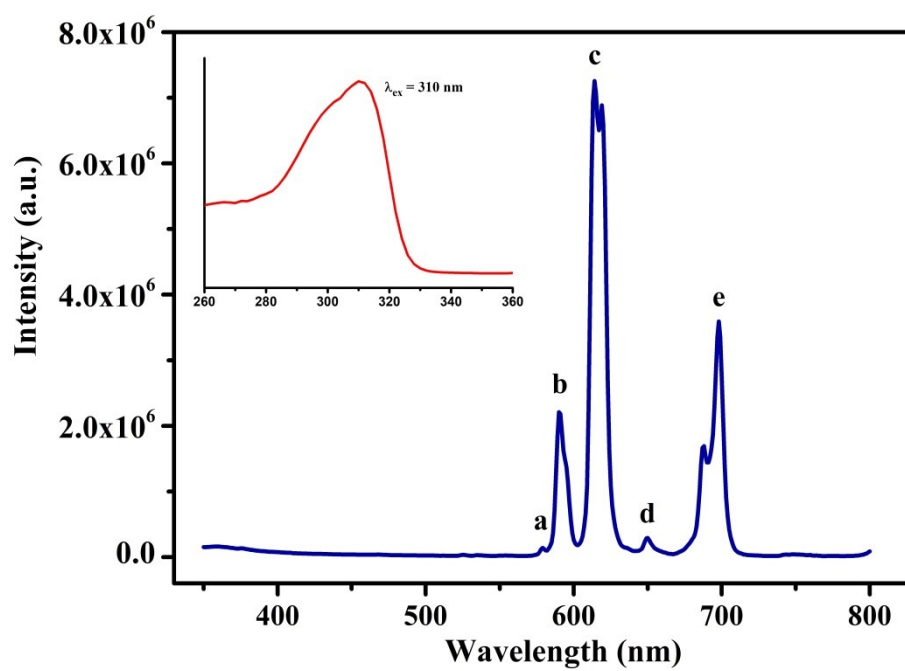

Figure S10. The photoluminescence spectra for Eu(4) (Inset: the excitation spectra of (4)).

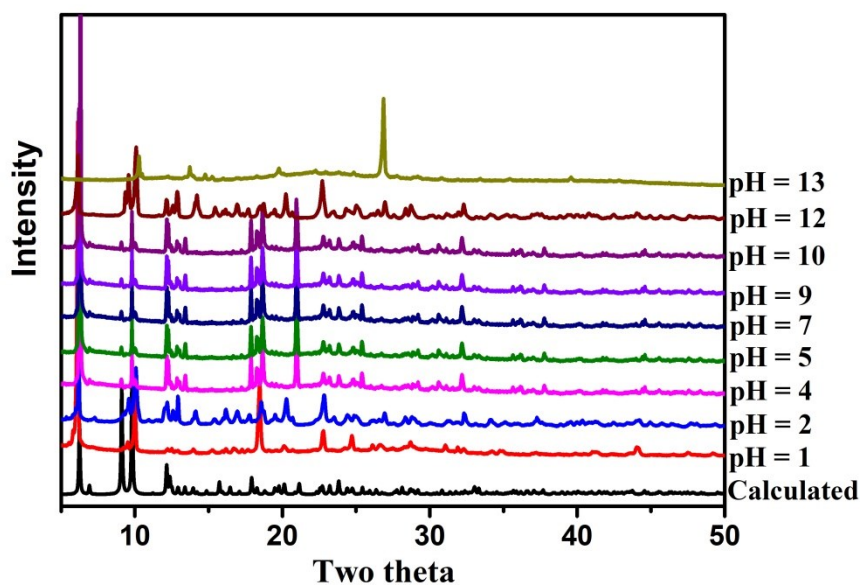

Figure S11. PXRD pattern of Eu(4) soaked into aqueous solutions with different pH values.

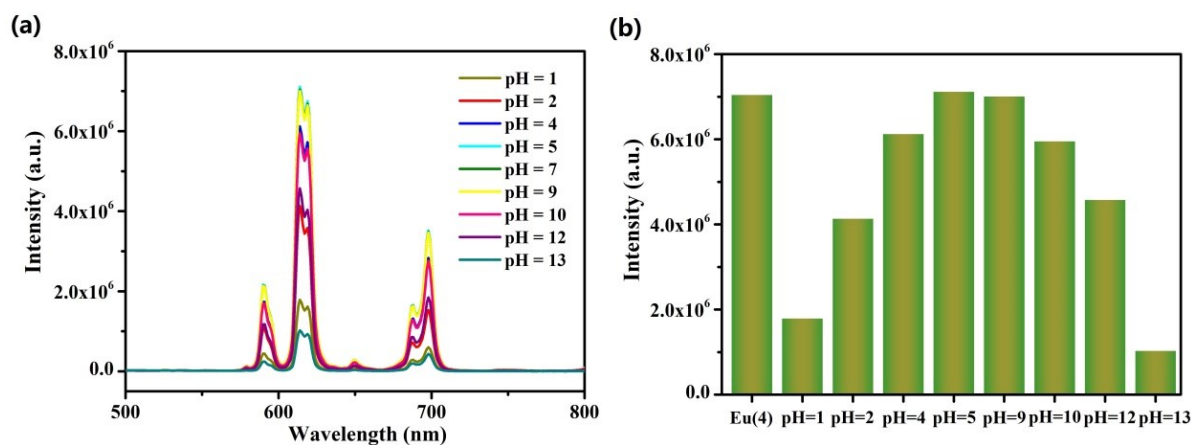

Figure S12 (a) pH-dependent emission spectra of Eu(4) in the aqueous solution with pH ranging from 1.00 to 13.00; (b) Histogram showed fluorescence emission of Eu(4) at 614 nm at different pH values.



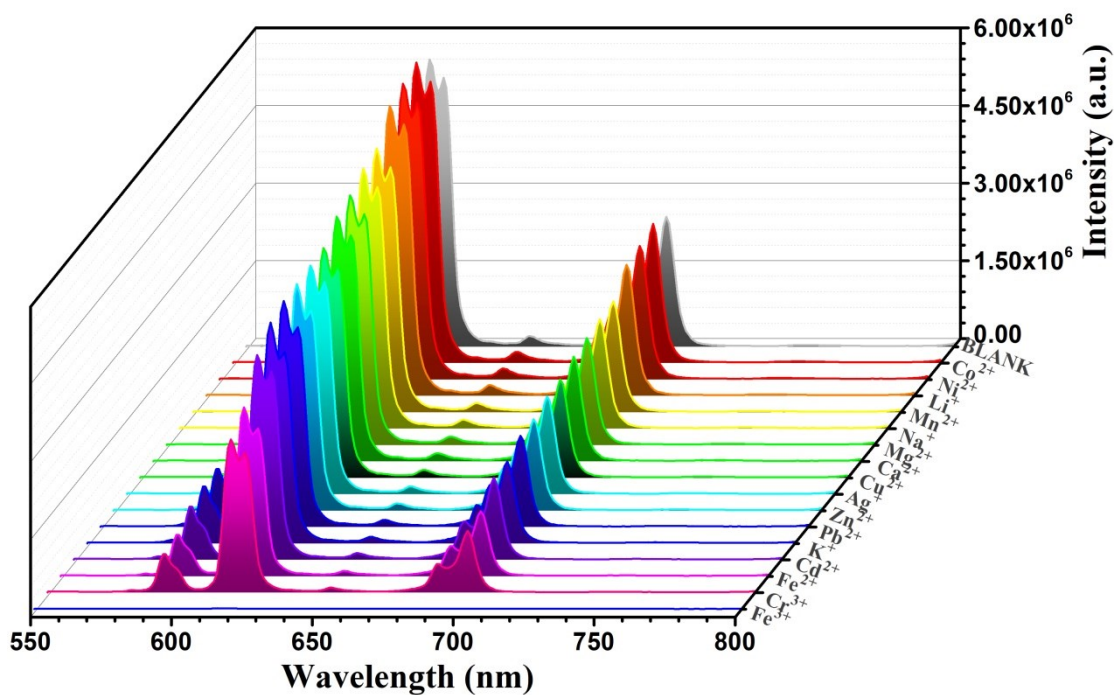

Figure S13. The emission spectra of Eu(4) dispersed in 0.01 M metal ion aqueous solutions.

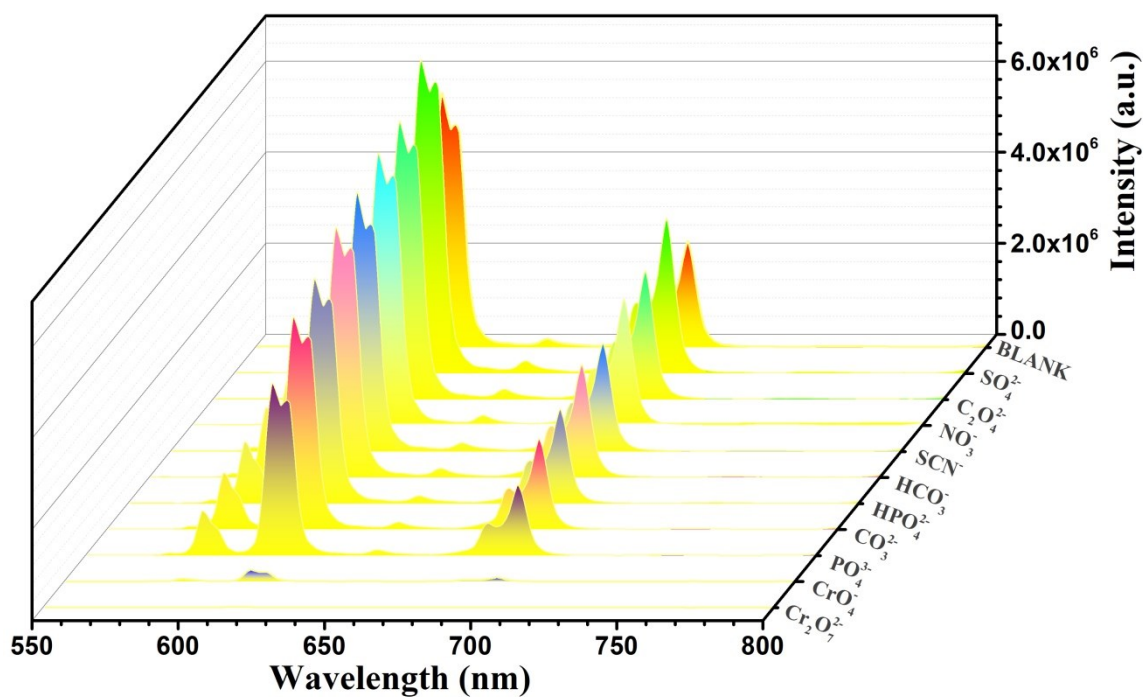

Figure S14. The emission spectra of Eu(4) dispersed in 0.01 M anion aqueous solutions.

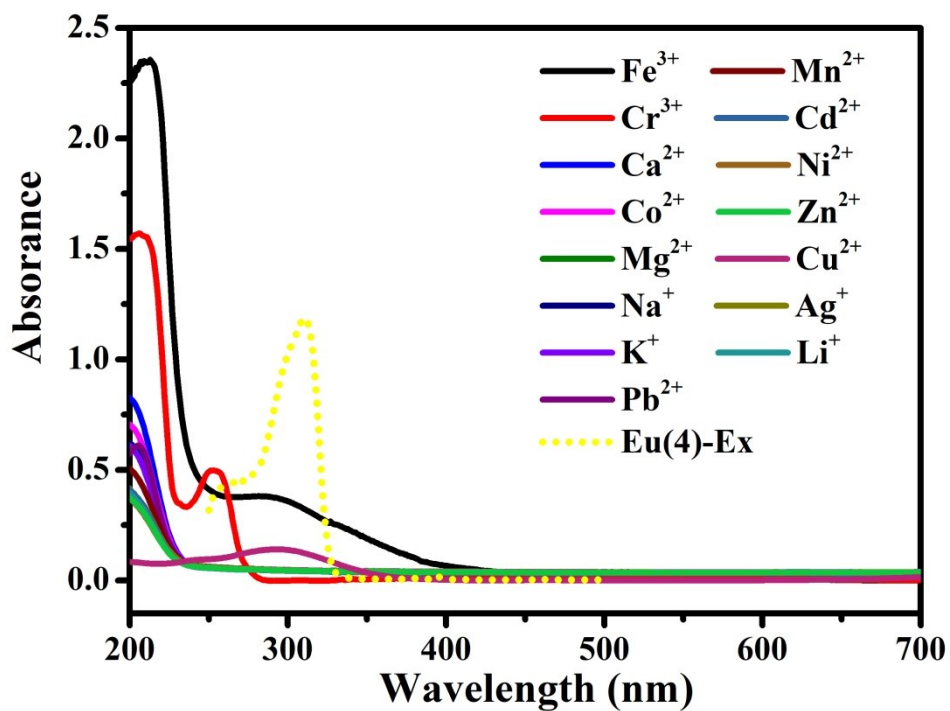

Figure S15. UV-vis spectra of different metal ions in aqueous solutions, and the excitation spectra of Eu(4).

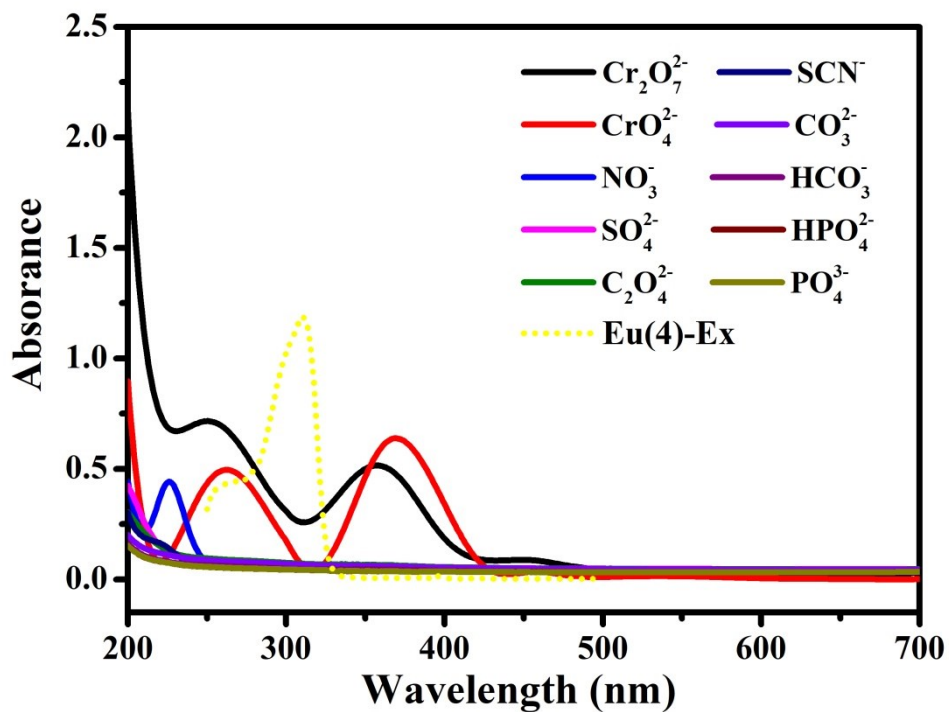

Figure S16. UV-vis spectra of different anions in aqueous solutions, and the excitation spectra of Eu(4).



Reference:

1. Sheldrick GM, *Acta Crystallog C* 2015, **71**, 3.
2. K.-Y. Wu, L. Qin, C. Fan, S.-L. Cai, T.-T. Zhang, W.-H. Chen, X.-Y. Tang and J.-X. Chen, *Dalton Trans.*, 2019, **48**, 8911.
3. Y. Liu, J. Ma, C. Xu, Y. Yang, M. Xia, H. Jiang, W. Liu, *Dalton Trans.*, 2018, **47**, 13543.
4. J.-M. Li, R. Li, X. Li, *CrystEngComm.*, 2018, **20**, 4962.
5. P. Wu, L. Xia, F. Fu, M. Wang, B. Wen, Z. Yang and J. Wang, *Inorg. Chem.*, 2020, **59**, 264.
6. Y. Tao, P. Zhang, J. Liu, X. Chen, X. Guo, H. Jin, J. Chai, L. Wang, Y. Fan, *New J. Chem.*, 2018, **42**, 19485.
7. D. Yang, L. Lu, S. Feng, M. Zhu, *Dalton Trans.*, 2020, **49**, 7514.
8. J.-H. Wei, J.-W. Yi, M.-L. Han, B. Li, S. Liu, Y.-P. Wu, L.-F. Ma, D.-S. Li, *Chem. Asian J.*, 2019, **14**, 3694.
9. S.-F. Tang and X. Hou, *Cryst. Growth Des.*, 2019, **19**, 45.
10. W.-Q. Tong, W.-N. Liu, L.-L. Ma, Y. Wang, J.-M. Wang, L. Hou, Y.-Y. Wang, *Dalton Trans.*, 2019, **48**, 7786.
11. M.-L. Han, G.-W. Xu, D.-S. Li, Azofra, M. L, J. Zhao, B. Chen, C. Sun, *ChemistrySelect.*, 2016, **1**, 3555.
12. Y.-J. Yang, Y.-H. Li, D. Liu and G.-H. Cui, *CrystEngComm.*, 2020, **22**, 1166.
13. J. Liu, Y. Ye, X. Sun, B. Liu, G. Li, Z. Liang and Y. Liu, *J. Mater. Chem. A.*, 2019, **7**, 1683.
14. X. Zhang, H. Chen, B. Li, G. Liu and X. Liu, *CrystEngComm.*, 2019, **21**, 1231.
15. T. Y. Gu, M. Dai, D. J. Young, Z. G. Ren, J. P. Lang, *Inorg. Chem.*, 2017, **56**, 4668.
16. T. Wiwasuku, J. Boonmak, K. Siriwong, V. Ervithayasuporn and S. Youngme, *Sensor Actuat B-Chem.*, 2019, **284**, 403.
17. Y.-N. Wang, Sh.-D. Wang, W.-J. Wang, X.-X. Hao, H. Qi. *Spectrochim. Acta A.*, 2020, **229**, 117915.
18. Y. Liu, Y. Zhao, Z.-Q. Liu, X.-H. Liu, X.-D. Zhang and W.-Y. Sun, *CrystEngComm.*, 2020, **22**, 304.
19. Q.-Q. Zhu, H. He, Y. Yan, J. Yuan, D.-Q. Lu, D.-Y. Zhang, F. Sun and G. Zhu, *Inorg. Chem.*, 2019, **58**, 7746.
20. Y. Zhang, J. Yang, D. Zhao, Z. Liu, D. Li, L. Fan and T. Hu, *CrystEngComm.*, 2019, **21**, 6130.

21. Q.-Q. Zhu, Q.-S. Zhou, H.-W. Zhang, W.-W. Zhang, D.-Q. Lu, M.-T. Guo, Y. Yuan, F. Sun and H. He, *Inorg. Chem.*, 2020, **59**, 1323.
22. R. Goswami, S. C. Mandal, N. Seal, B. Pathak and S. Neogi, *J. Mater. Chem. A.*, 2019, **7**, 19471.
23. F. Guo, C. Su, Y. Fan and W. Shi, *Dalton Trans.*, 2019, **48**, 12910.
